# Supplementary material for: Mining Sorghum Biodiversity—Potential of Dual-Purpose Hybrids for Bio-Economy
Source: MDPI journal article supplement (doi:10.3390/d13050192), 2021-04-29
Supplement: s1 [file s1]

**Table S1.** Temperature and rainfall measured in Karlsruhe during the summer season 2018.

| Month     | Average temperature | Highest temperature | Lowest temperature | Rain    |
|-----------|---------------------|---------------------|--------------------|---------|
| May       | 18.0 °C             | 29 °C               | 6.3 °C             | 78.2 mm |
| June      | 21.0 °C             | 31 °C               | 10.9 °C            | 52.3 mm |
| July      | 23.0 °C             | 35 °C               | 15.0 °C            | 82.6 mm |
| August    | 23.0 °C             | 36 °C               | 9.4 °C             | 13.8 mm |
| September | 18.0 °C             | 32 °C               | 6.2 °C             | 25.8 mm |

**Table S2.** Analysis of variance of ten agro-morphological traits recorded from 14 sweet, grain and dual-purpose sorghum genotypes.

| Source      | DF | PHT          | LN           | IN     | FLW       | CY          | JY         | BY         | Brix       | SY       | EY       |
|-------------|----|--------------|--------------|--------|-----------|-------------|------------|------------|------------|----------|----------|
| Genotype    | 13 | 10415.09**** | 9.65***<br>* | 5.95*  | 1259.52** | 2806.63**** | 688.30**** | 362.50**** | 141.40**** | 9.61**** | 4.49**** |
| Replication | 2  | 121.80ns     | 0.07ns       | 0.07ns | 7.66ns    | 4.58ns      | 1.86ns     | 3.59ns     | 0.46ns     | 0.04ns   | 0.01ns   |
| Error       | 26 | 53.35        | 0.04         | 0.04   | 5.74      | 8.43        | 1.17       | 32.35      | 0.11       | 0.03     | 0.01     |
| Mean        |    | 357.13       | 11.07        | 10.92  | 41.44     | 75.47       | 30.55      | 31.99      | 11.88      | 3.39     | 3.01     |
| C.V         |    | 2.04         | 1.93         | 1.95   | 5.78      | 3.84        | 3.55       | 4.7        | 2.80       | 5.62     | 3.80     |

PHT, Plant height (cm); LN, leaf number; IN, Internode number; FLW, Fresh leaf weight (g/plant); CY, Cane yield (t/ha); Juice yield (Kl/ha); BY, Bagasse yield (t/ha); Brix, SY, Sugar yield (t/ha) and EY, theoretical ethanol yield (Kl/ha). ns= non-significant; \*, \*\*, \*\*\* and \*\*\*\* Significant at 0.05, 0.01, 0.001, and 0.0001 probability levels, respectively.
